# Supplementary material for: Identification and ranking of volcanic tsunami hazard sources in Southeast Asia
Source: Copernicus journal article supplement (doi:10.5194/egusphere-2022-130), 2022-04-04
Supplement: Supplementary file [file egusphere-2022-130-AC1-supplement.zip]

# Identification and ranking of subaerial volcanic tsunami hazard sources in Southeast Asia

## Supplementary Material A - NETVOLC and MORVOLC code output

The figure illustrates the working principle of the NETVOLC (Euillades et al 2013) and MORVOLC (Grosse et al. 2009; 2012) codes. Firstly and using NETVOLC, an edifice boundary is extracted from DEM data by utilizing a minimum cost function to iteratively search for concave breaks in the slope of the volcano (or minimum profile convexity). This is shown in (a) for an idealized triangular cone volcano and (c, d) applied to Lewotobi volcano, Indonesia. This boundary is then used in MORVOLC to systematically extract and visualise morphometry data including elevation, slope steepness over various intervals and edifice portions, edifice volume and shape factors. A full list can be found in the table. The data is then plotted as maps (c-e), 3D-views (f) and profiles (g).

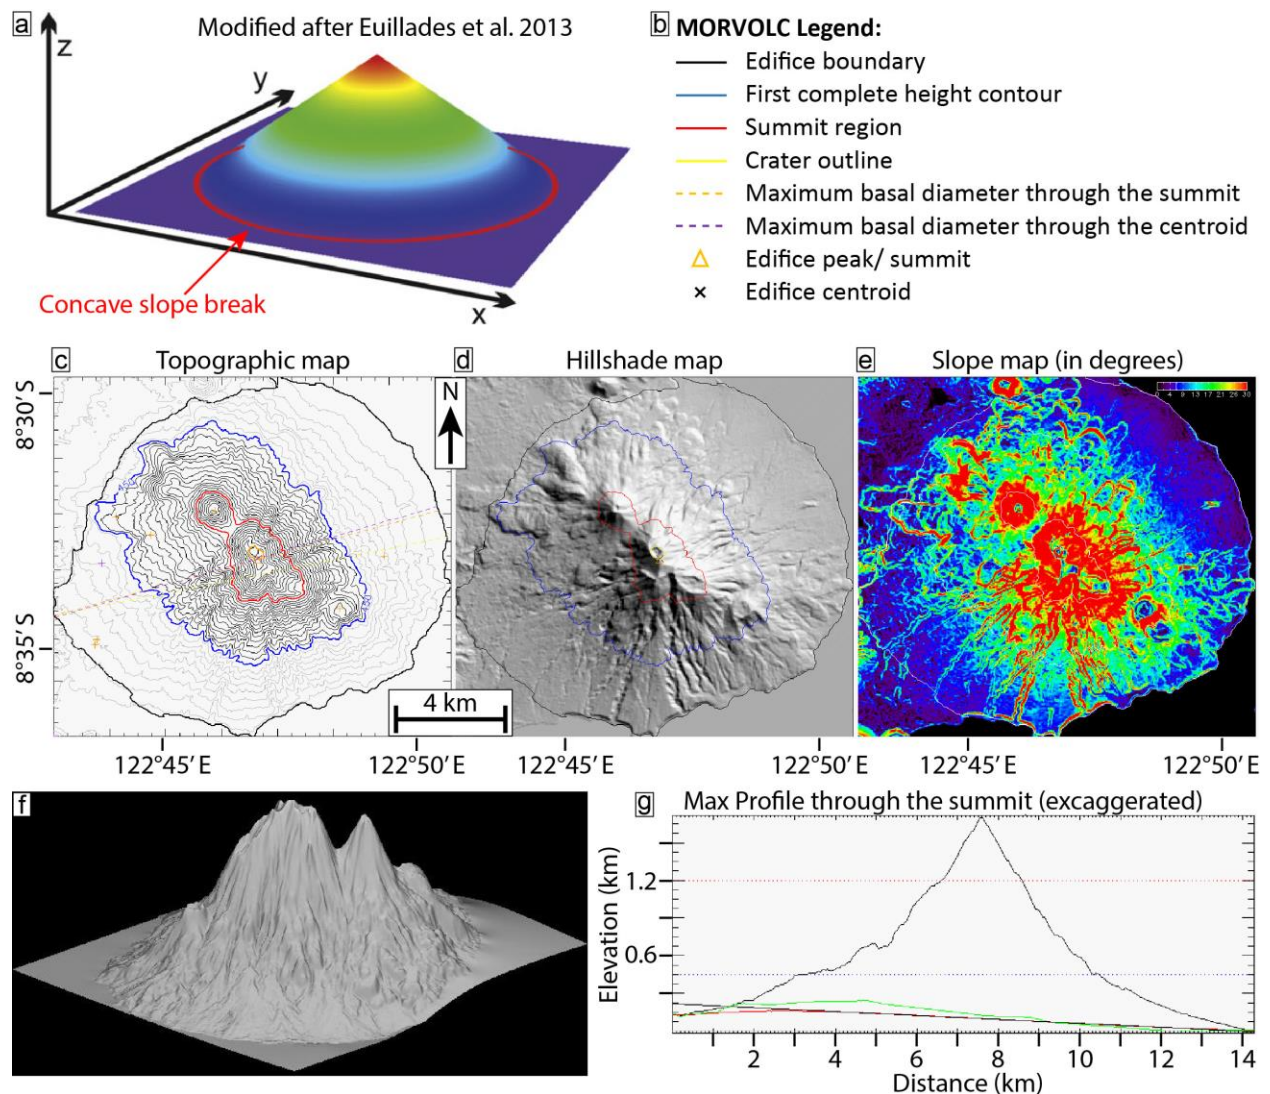

Table of the MORVOLC data output for Lewotobi volcano:

| PARAMETER                                                     | VALUE     | DESCRIPTION                                                                                    |
|---------------------------------------------------------------|-----------|------------------------------------------------------------------------------------------------|
| General data                                                  |           |                                                                                                |
| Name                                                          | Lewotobi  | volcano name                                                                                   |
| Columns                                                       | 465       | number of columns of the volcano DEM                                                           |
| Rows                                                          | 422       | number of rows of the volcano DEM                                                              |
| PXsizeX                                                       | 30.6421   | pixel dimension in x (m)                                                                       |
| PXsizeY                                                       | 30.6421   | pixel dimension in y (m)                                                                       |
| Equidistance                                                  | 50        | chosen equidistance of elevation curves (m)                                                    |
| LAT                                                           | 81.545531 | summit location latitude                                                                       |
| LON                                                           | 121.53436 | summit location longitude                                                                      |
| Proj_E                                                        | 475945.64 | summit location Projection East                                                                |
| Proj_N                                                        | 9054402.7 | summit location Projection North                                                               |
| ElevMin                                                       | -1.16E-09 | lowermost elevation (m)                                                                        |
| ElevMax                                                       | 1699.36   | summit elevation (m)                                                                           |
| Base size (metric)                                            |           |                                                                                                |
| AreaBase                                                      | 130.29694 | base area (km <sup>2</sup> )                                                                   |
| WidthBase                                                     | 12880.187 | avg base width (m): diameter of circle of equal area as base                                   |
| AxisBaseMin(s)                                                | 11235.978 | min base diameter that passes through summit point (m)                                         |
| AxisBaseMax(s)                                                | 14301.172 | max base diameter that passes through summit point (m)                                         |
| AxisBaseMean(s)                                               | 12899.546 | mean of base diameters that pass through summit point (m)                                      |
| AxisBaseMin(bc)                                               | 11212.582 | min base diameter that passes through base centroid (m)                                        |
| AxisBaseMax(bc)                                               | 14273.1   | max base diameter that passes through base centroid (m)                                        |
| AxisBaseMean(bc)                                              | 12901.269 | mean of base diameters that pass through base centroid (m)                                     |
| AxisBaseMax                                                   | 14374.509 | max base diameter that does not have to pass through any point (m)                             |
| Lowermost closed curve (main flank) elevation & size (metric) |           |                                                                                                |
| ElevLowCurve                                                  | 450       | elevation of lowermost closed curve (ie start of main flank) (m)                               |
| ElevLowCurveFraction                                          | 0.264806  | elevation fraction of lowermost closed curve (ie start of main flank)                          |
| AreaLowCurve                                                  | 51.729595 | lowermost curve (ie main flank) area (km <sup>2</sup> )                                        |
| WidthLowCurve                                                 | 8115.674  | lowermost curve (ie main flank) width (m): diameter of circle of equal area as lowermost curve |
| AxisLowCurve                                                  | 10502.965 | max lowermost curve (ie main flank) diameter that does not have to pass through any point (m)  |

|                                         |            |                                                                                           |
|-----------------------------------------|------------|-------------------------------------------------------------------------------------------|
| Summit region elevation & size (metric) |            |                                                                                           |
| ElevSummitReg                           | 1200       | elevation of curve considered start of summit region (m)                                  |
| ElevSummitRegFraction                   | 0.706149   | elevation fraction of curve considered start of summit region                             |
| AreaSummitReg                           | 7.1215696  | summit region area (km <sup>2</sup> )                                                     |
| WidthSummitReg                          | 3011.223   | summit region width (m): diameter of circle of equal area as summit region                |
| AxisSummitRegMax(cont)                  | 5103.9772  | max summit region diameter that does not have to pass through any point (m)               |
| Height (metric)                         |            |                                                                                           |
| HeightMax                               | 1699.36    | max edifice height considering summit and lowermost elevation as base (m)                 |
| HeightPoly1                             | 1601.09    | edifice height considering max height between DEM and first degree polynomial surface (m) |
| HeightTIN                               | 1573.84    | edifice height considering max height between DEM and TIN surface (m)                     |
| HeightIDW                               | 1599.94    | edifice height considering max height between DEM and INVERSE DISTANCE surface (m)        |
| Volume (metric)                         |            |                                                                                           |
| VolMax                                  | 58.263303  | max edifice volume considering lowermost elevation as base (km <sup>3</sup> )             |
| VolPoly1                                | 46.018245  | edifice volume using first degree polynomial surface as base (km <sup>3</sup> )           |
| VolTIN                                  | 42.88968   | edifice volume using TIN surface as base (km <sup>3</sup> )                               |
| VolIDW                                  | 45.416306  | edifice volume using INVERSE DISTANCE surface as base (km <sup>3</sup> )                  |
| Plan shape (dimensionless)              |            |                                                                                           |
| Eloutline                               | 1.2454942  | ellipticity index of edifice outline                                                      |
| Ioutline                                | 1.1749534  | irregularity index of edifice outline                                                     |
| Elavg                                   | 2.11017    | average ellipticity index of main elevation curves of edifice flank                       |
| Iavg                                    | 1.3545     | average irregularity index of main elevation curves of edifice flank                      |
| Profile shape (dimensionless)           |            |                                                                                           |
| HWratioPOLY1                            | 0.12430681 | height/width(base) ratio (considering poly1 base height and basal width)                  |
| HWratioTIN                              | 0.1221909  | height/width(base) ratio (considering TIN base height and basal width)                    |
| HWratioIDW                              | 0.12421738 | height/width(base) ratio (considering IDW base height and basal width)                    |
| WWratio(cont)                           | 0.23378722 | width(summit)/width(base) ratio                                                           |
| Slope (degrees)                         |            |                                                                                           |
| SlopeMin(tot)                           | 1.66E-15   | min slope value of whole edifice (degrees)                                                |
| SlopeMax(tot)                           | 58.5457    | max slope value of whole edifice (degrees)                                                |
| SlopeMean(tot)                          | 15.3357    | mean slope of whole edifice (degrees)                                                     |
| SlopeMedian(tot)                        | 12.9426    | median slope of whole edifice (degrees)                                                   |

|                             |          |                                                                                                               |
|-----------------------------|----------|---------------------------------------------------------------------------------------------------------------|
| SlopeSD(tot)                | 9.8259   | standard deviation of slope of whole edifice (degrees)                                                        |
| SlopeMean(flank)            | 14.5043  | mean slope of edifice flank below summit region (degrees)                                                     |
| SlopeMedian(flank)          | 12.3     | median slope of edifice flank below summit region (degrees)                                                   |
| SlopeSD(flank)              | 9.24581  | standard deviation of slope of edifice flank below summit region (degrees)                                    |
| SlopeMean(lowflank)         | 10.7242  | mean slope of edifice low flank below first closed curve (degrees)                                            |
| SlopeMedian(lowflank)       | 8.92146  | median slope of edifice low flank below first closed curve (degrees)                                          |
| SlopeSD(lowflank)           | 6.82392  | standard deviation of slope of edifice low flank below first closed curve (degrees)                           |
| SlopeMean(mainflank)        | 21.2147  | mean slope of edifice main flank above first closed curved and below summit region (degrees)                  |
| SlopeMedian(mainflank)      | 20.3128  | median slope of edifice main flank above first closed curved and below summit region (degrees)                |
| SlopeSD(mainflank)          | 9.17467  | standard deviation of slope of edifice main flank above first closed curved and below summit region (degrees) |
| SlopeMean(summit)           | 30.2164  | mean slope of summit region (degrees)                                                                         |
| SlopeMedian(summit)         | 31.5854  | median slope of summit region (degrees)                                                                       |
| SlopeSD(summit)             | 7.79459  | standard deviation of slope of summit region (degrees)                                                        |
| ElevSlopeMax                | 1200     | elevation of flank interval (top value) with max avg slope (m)                                                |
| HeightFracSlopeMax          | 0.706149 | height fraction of flank interval (top value) with max avg slope                                              |
| SlopeAvgMax                 | 28.6346  | avg slope of flank interval with max avg slope (degrees)                                                      |
| <hr/> Orientation (degrees) |          |                                                                                                               |
| AzimAxisBaseMax(s)          | 74.7245  | azimuth of max base diameter that passes through summit point (degrees)                                       |
| AzimAxisBaseMax(bc)         | 73.8323  | azimuth of max base diameter that passes through base centroid (degrees)                                      |
| AzimAxisBaseMax             | 78.6901  | azimuth of max base diameter that does not have to pass through any point (degrees)                           |
| AzimCurvesAvg               | 129.262  | avg circular azimuth of max diameters of main curves on edifice flank (degrees)                               |
| <hr/> Peaks & holes         |          |                                                                                                               |
| PeaksNumTot                 | 7        | total number of secondary peaks                                                                               |
| PeaksNumFlank               | 6        | number of secondary peaks on edifice flank                                                                    |
| PeaksNumSummit              | 1        | number of secondary peaks on summit region                                                                    |
| HolesNumTot                 | 2        | total number of holes                                                                                         |
| HolesNumFlank               | 2        | number of holes on edifice flank                                                                              |
| HolesNumSummit              | 0        | number of holes on summit region                                                                              |
| <hr/> Various               |          |                                                                                                               |
| NumMainCurvesFlank          | 16       | number of main elevation curves on edifice flank                                                              |

|                             |             |                                                                              |
|-----------------------------|-------------|------------------------------------------------------------------------------|
| NumMainCurvesSummit         | 8           | number of main elevation curves on summit region                             |
| NumSlopeBins                | 34          | number of slope bins (max edifice height / chosen equidistance)              |
| <hr/> Summit crater/caldera |             |                                                                              |
| CraterElevMin               | 1551.78     | lowermost crater elevation (m)                                               |
| CraterElevMinNorm           | 0.913156    | normalized lowermost crater elevation (fraction)                             |
| CraterArea                  | 0.17886774  | crater area (km <sup>2</sup> )                                               |
| CraterWidth                 | 477.22267   | crater avg width contour-based (m)                                           |
| CraterAxisMax               | 572.44166   | max crater diameter (m)                                                      |
| CraterAxisMean              | 509.4546    | mean crater diameter (m)                                                     |
| CraterAzimAxisMax           | 105.524     | azimuth of max crater diameter (degrees)                                     |
| CraterDepthMax              | 147.58      | max crater depth using uppermost crater elevation as top (m)                 |
| CraterDepthIDW              | 68.2279     | crater depth using IDW surface as top (m)                                    |
| CraterVolMax                | 0.017637607 | max crater volume using uppermost crater elevation as top (km <sup>3</sup> ) |
| CraterVolIDW                | 0.003995437 | crater volume using IDW surface as top (km <sup>3</sup> )                    |
| CraterEloutline             | 1.438866    | ellipticity index of crater outline                                          |
| CraterIoutline              | 1.0896038   | irregularity index of crater outline                                         |
| CraterDWratio               | 0.005297121 | crater depth / crater width ratio                                            |
| CraterWbaseWratio           | 0.037050913 | crater width / edifice base width ratio                                      |
| CraterWsummitWratio         | 0.15848135  | crater width / summit region width ratio                                     |
| CraterDedifHratio(max)      | 0.0868444   | crater depth / edifice height ratio (considering max values)                 |
| CraterDedifHratio(idw)      | 0.042644    | crater depth / edifice height ratio (considering IDW values)                 |
| CraterVedifVratio(idw)      | 8.80E-05    | crater volume / edifice volume ratio (considering IDW values)                |
| CraterSlopeMin              | 0.85252     | min slope value of whole crater (degrees)                                    |
| CraterSlopeMax              | 42.3845     | max slope value of whole crater (degrees)                                    |
| CraterSlopeMean             | 21.3609     | mean slope value of whole crater (degrees)                                   |
| CraterSlopeMedian           | 21.1633     | median slope value of whole crater (degrees)                                 |
| CraterSlopeSD               | 10.57       | standard deviation of slope values of whole crater (degrees)                 |

---
