# Supplementary material for: Identification and ranking of volcanic tsunami hazard sources in Southeast Asia
Source: Copernicus journal article supplement (doi:10.5194/egusphere-2022-130), 2022-04-04
Supplement: Supplementary file [file egusphere-2022-130-AC1-supplement.zip]

# Identification and ranking of subaerial volcanic tsunami hazard sources in Southeast Asia

## Supplementary Material D – Tsunami-travel-time models

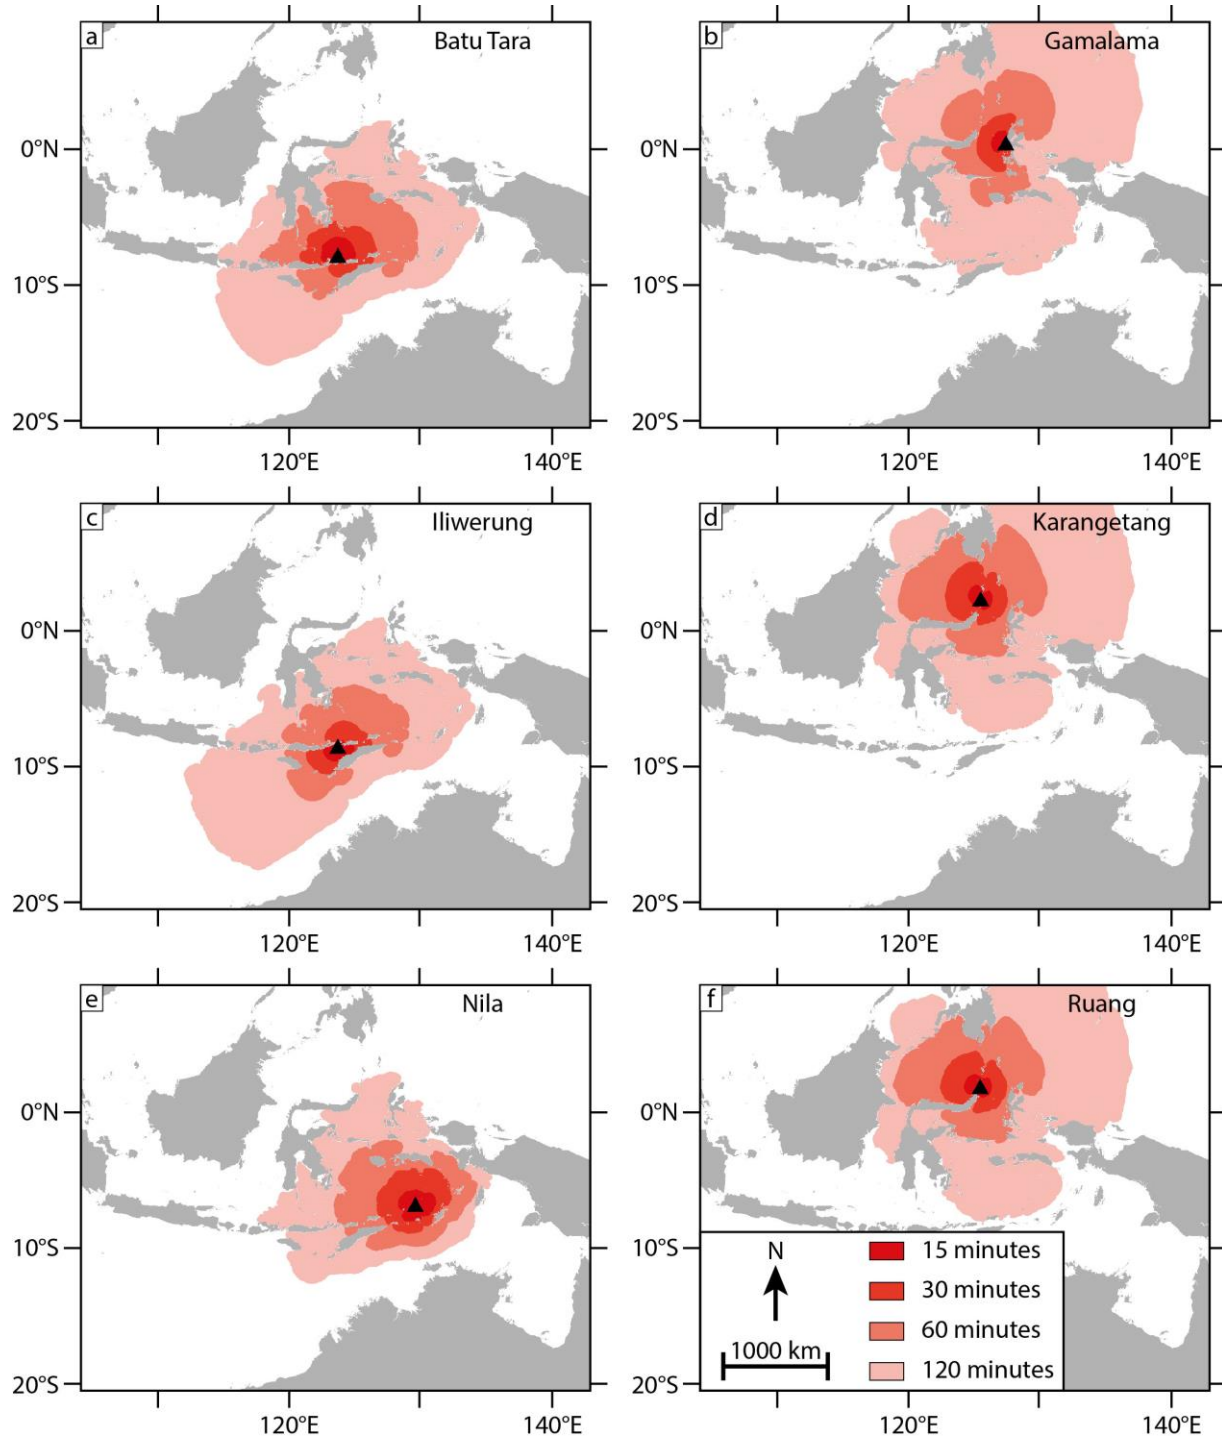

Figure S1: Tsunami-travel times for Individual volcanoes (a) Batu Tara, (b) Gamalama, (c) Iliwerung, (d) Karangetang, (e) Nila and (f) Ruang.

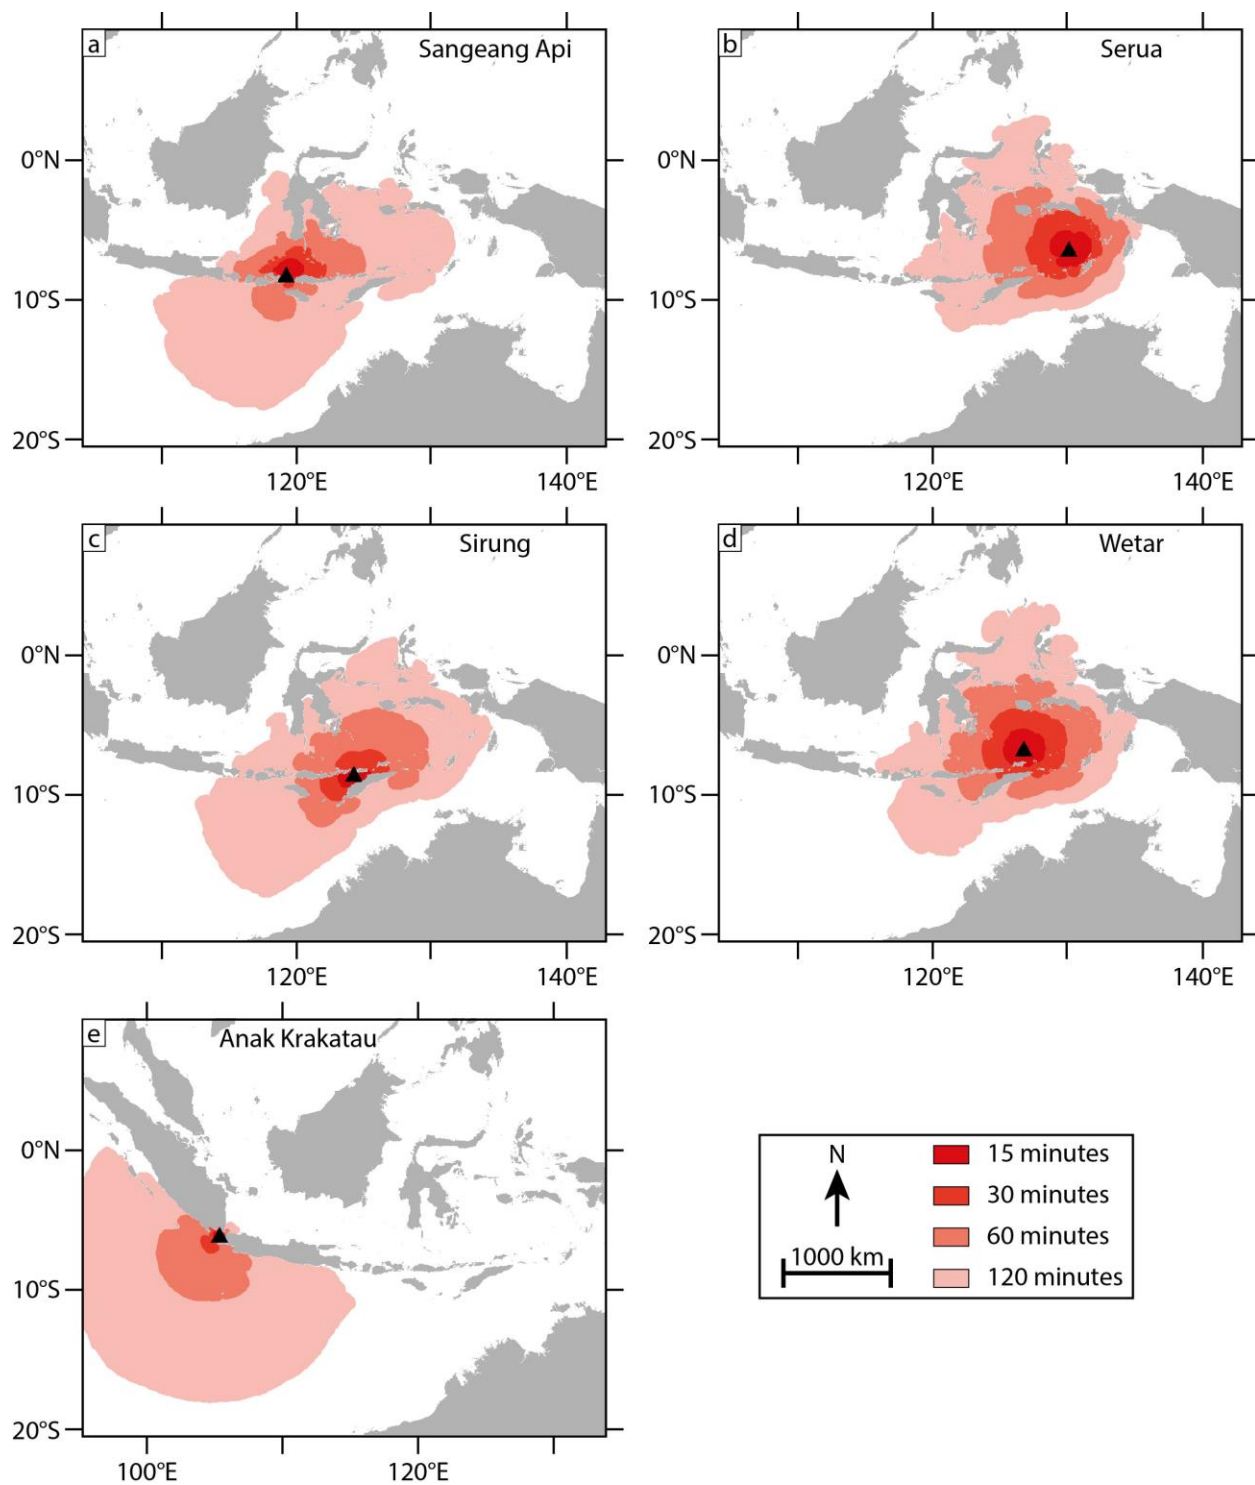

Figure S2: Tsunami-travel times for Individual volcanoes (a) Sangeang Api, (b) Serua, (c) Sirung, (d) Wetar and (e) Anak Krakatau.

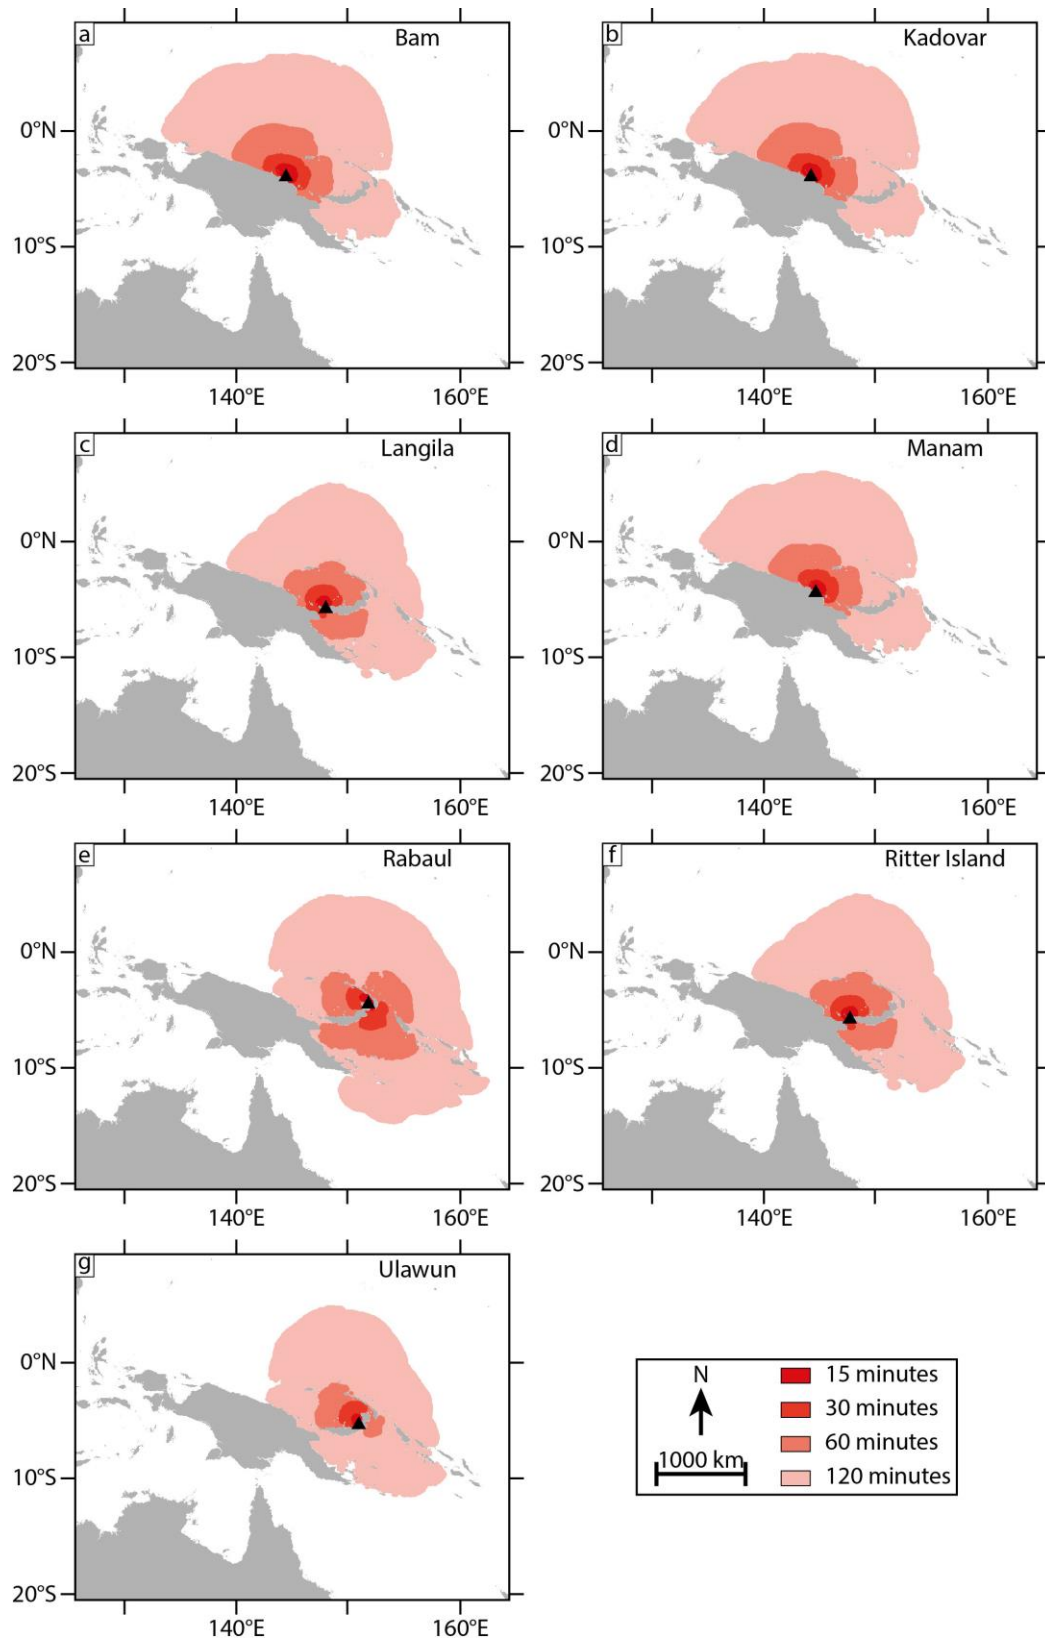

Figure S3: Tsunami-travel times for Individual volcanoes (a) Bam, (b) Kadovar, (c) Langila, (d) Manam, (e) Rabaul, (f) Ritter Island and (g) Ulawun.
